# Supplementary material for: Unraveling the complex burial history of the Antrim formation in Michigan basin using paleomagnetism, rock magnetism and geochemistry
Source: Frontiers journal article supplement (doi:10.3389/feart.2022.944220), 2022-08-31
Supplement: Data_Sheet_1.PDF [file Data_Sheet_1.PDF]

## Supplementary Material

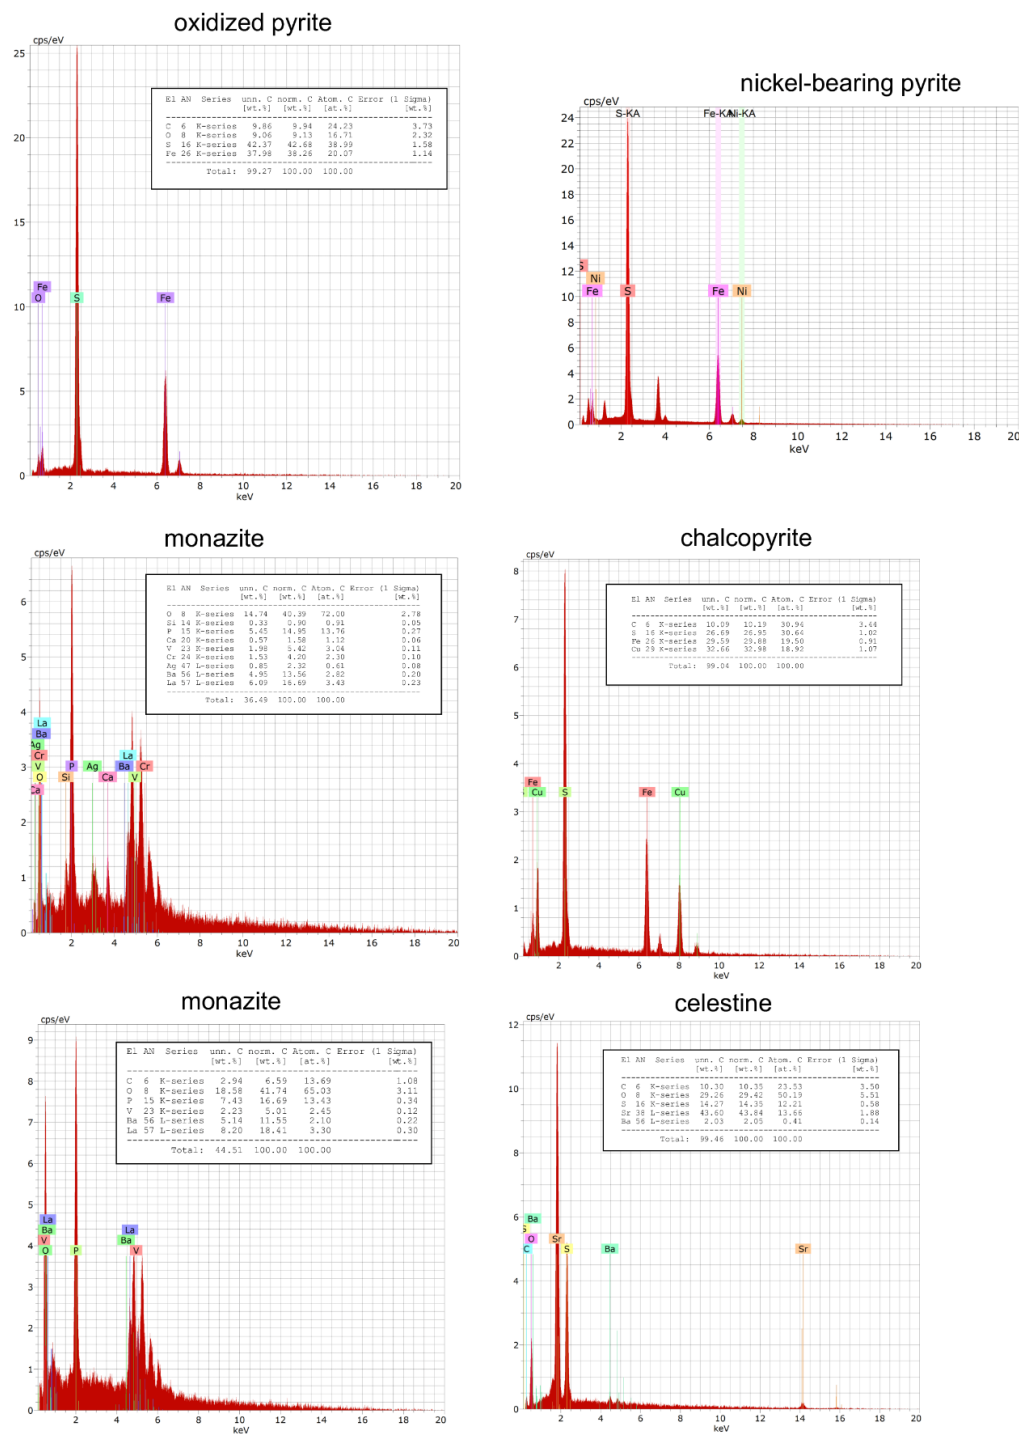

Figure S1. EDS Spectra for Figure 11.

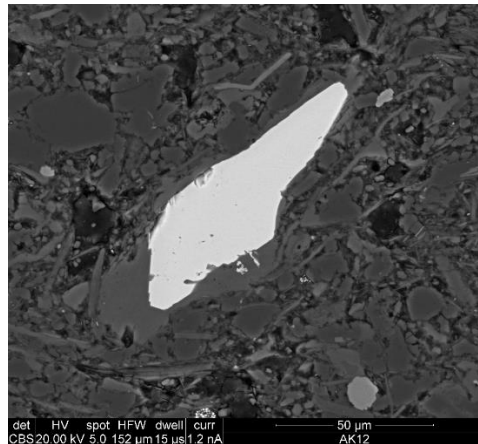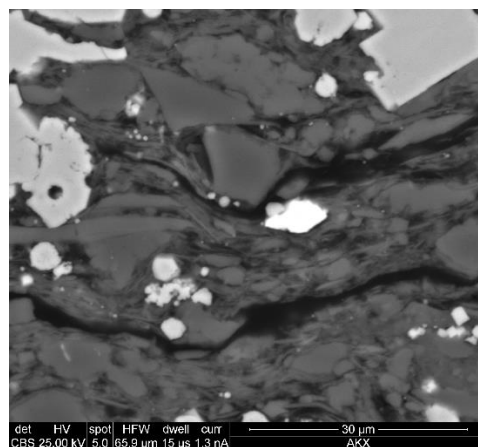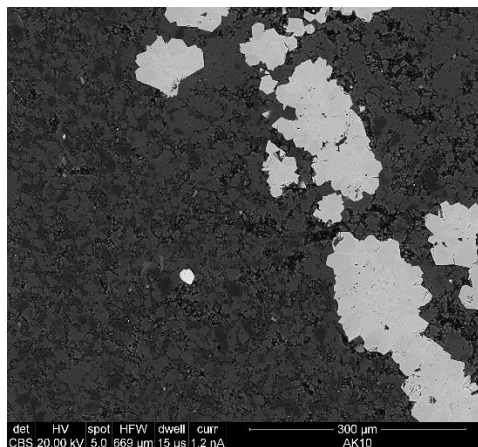

Figure S2. (Top, Backscatter SEM) Chalcopyrite grain with rutile in bottom right. (Middle, Backscatter SEM) Monazite grain (center of image). (Bottom, Backscatter SEM) Oxidized pyrite. Bright grain is chalcopyrite.
